# Supplementary material
Source: PubMed Central journal article supplement (PMC1895491)

### A. Binding to iNOS probe

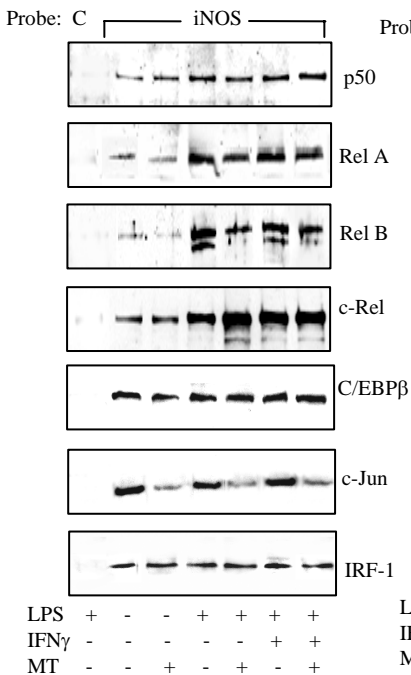

### B. Binding to COX-2 probe

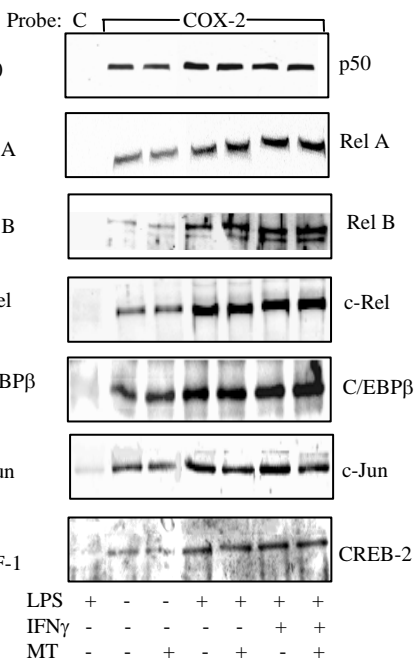

### C. Protein levels

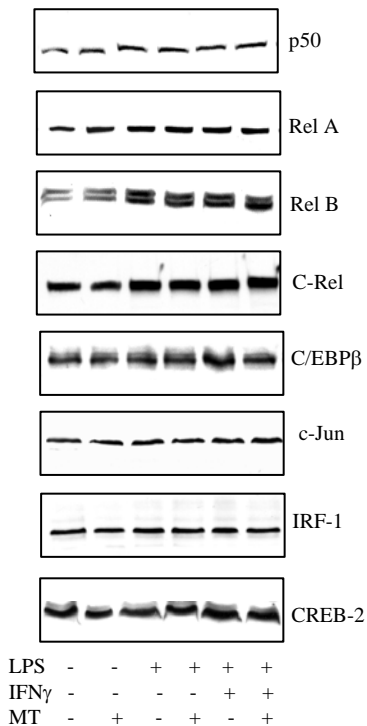

Supplement: blood_2005-09-3691_1.pdf [file blood_2005-09-3691_1.pdf]
